# Supplementary material for: Electroactive phase dependent triboelectric nanogenerator performance of PVDF–TiO2 composites
Source: Royal Society of Chemistry journal article supplement (doi:10.1039/d4ya00525b), 2025-01-01
Supplement: d4ya00525b1.pdf [file d4ya00525b1.pdf]

## Electroactive phase dependent triboelectric nanogenerator performance of PVDF-TiO<sub>2</sub> composites

Irthasa Aazem,<sup>ab</sup> Charchit Kumar,<sup>d</sup> Ryan Walden,<sup>ab</sup> Aswathy Babu,<sup>ab</sup> Amit Goswami,<sup>ac</sup> Steven Hinder,<sup>e</sup> Gaurav Khandelwal,<sup>d</sup> Daniel M. Mulvihill,<sup>d</sup> Gerard McGrenaghan,<sup>ac</sup> \*Suresh C. Pillai \*<sup>ab</sup>

<sup>a</sup> *Nanotechnology and Bio-Engineering Research Group, Department of Environmental Science, Atlantic Technological University, ATU Sligo, Ash Lane, Sligo, F91 YW50, Ireland*

**E-mail:** [Suresh.Pillai@atu.ie](mailto:Suresh.Pillai@atu.ie)

<sup>b</sup> *Health and Biomedical (HEAL) Strategic Research Centre, Atlantic Technological University, ATU Sligo, Ash Lane, Sligo, F91 YW50, Ireland*

<sup>c</sup> *Department of Mechanical and Manufacturing Engineering, Atlantic Technological University, Ash Lane, Sligo F91 YW50, Ireland*

<sup>d</sup> *Materials and Manufacturing Research Group, James Watt School of Engineering, University of Glasgow, Glasgow G12 8QQ, UK*

<sup>e</sup> *The Surface Analysis Laboratory, Faculty of Engineering and Physical Sciences, University of Surrey, Guildford, Surrey GU2 7XH, UK*

\*Corresponding Author

Email addresses: [Irthasa.AazemVS@research.atu.ie](mailto:Irthasa.AazemVS@research.atu.ie) (Irthasa Aazem VS),

[Suresh.Pillai@atu.ie](mailto:Suresh.Pillai@atu.ie) (Suresh C. Pillai)

## **Table of contents for the supporting data:**

**Figure S1.** Photographic image and cross-sectional SEM image of a PVT900 film.

**Figure S2.** Comparison of XRD patterns of TiO<sub>2</sub>400 – TiO<sub>2</sub>1000.

**Figure S3.** SEM images of drop casted and spin-coated PVDF films.

**Figure S4.** SEM images of spin-coated PVDF film and PVDF – TiO<sub>2</sub> films with 15 wt% TiO<sub>2</sub> loading – (a) Pristine PVDF film, (b) PVDF – TiO<sub>2</sub>500 film, (c) PVDF – TiO<sub>2</sub>600 film, (d) PVDF – TiO<sub>2</sub>700 film, (e) PVDF – TiO<sub>2</sub>900 film and (f) PVDF – TiO<sub>2</sub>1000 film.

**Figure S5:** PE effect contribution on the electrical output of PVDF tested by pairing with ITO-coated PET films at a contact force 60N and a frequency of.

**Video S6.** Video demonstration of the TENG ability of the fabricated device by glowing 46 LEDs connected in series to the PVDF – TiO<sub>2</sub>900 film TENG.



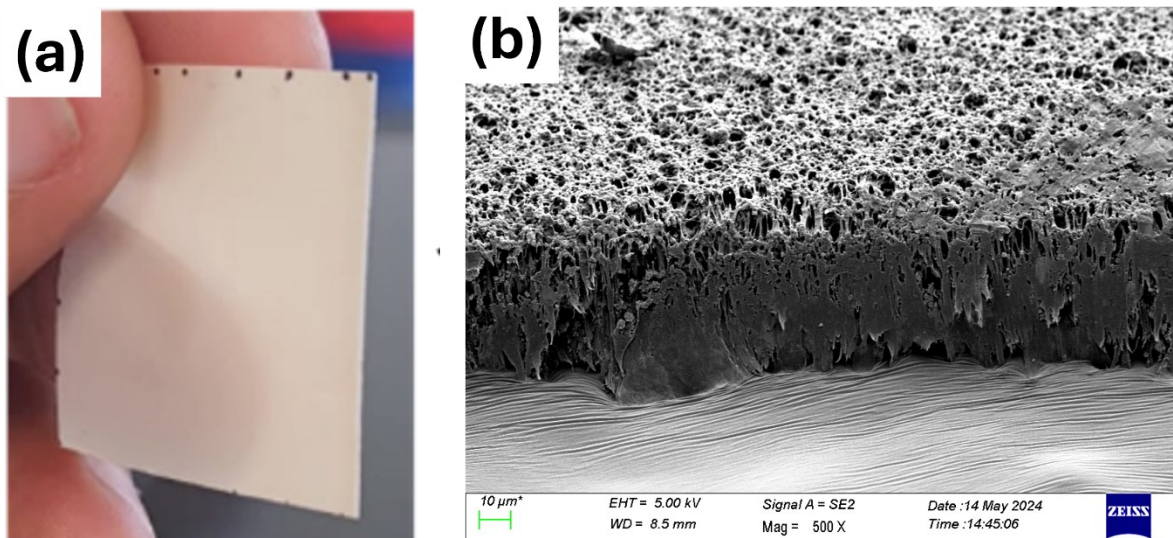

**Figure S1.** Photographic image (a) and cross-sectional SEM image (b) of a PVT900 film

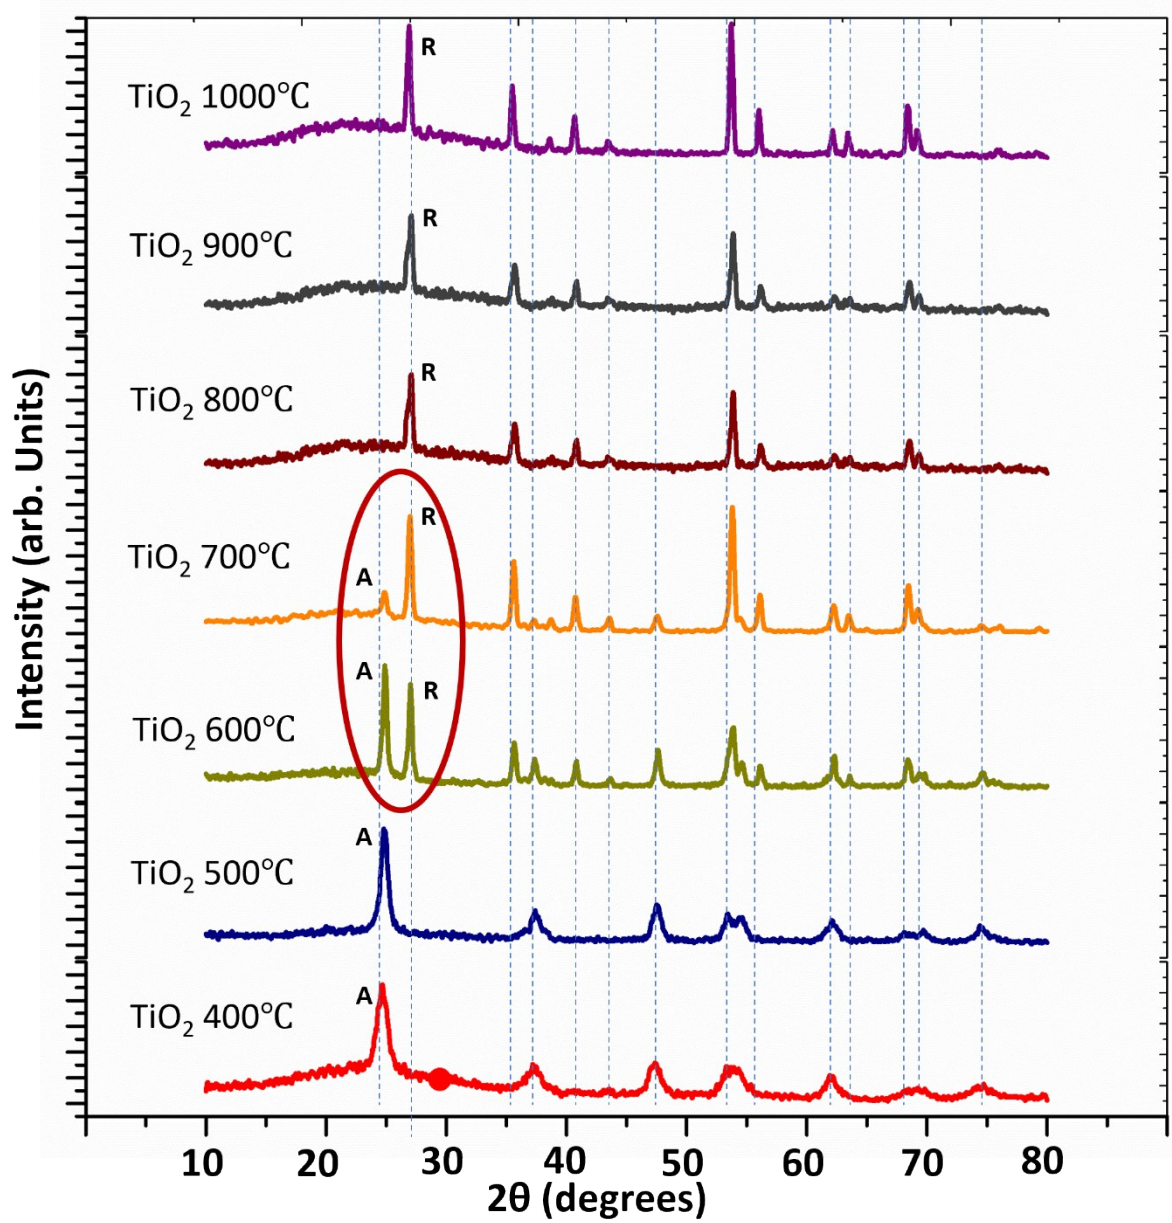

Figure S2. Comparison of XRD patterns of TiO<sub>2</sub>400 – TiO<sub>2</sub>1000

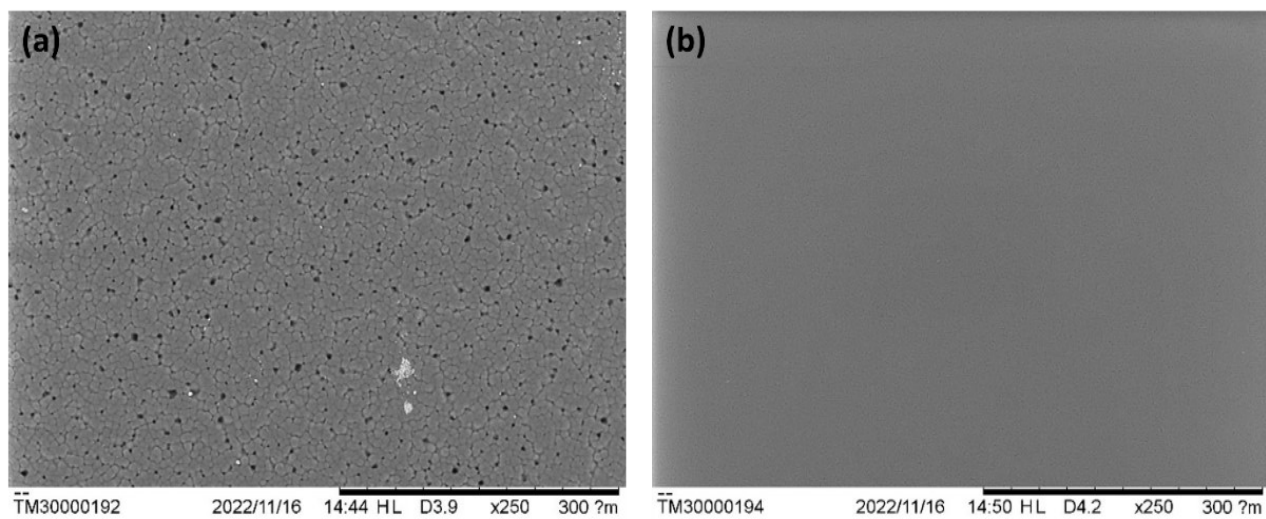

**Figure S3.** SEM images of (a) drop casted and (b) spin-coated PVDF films

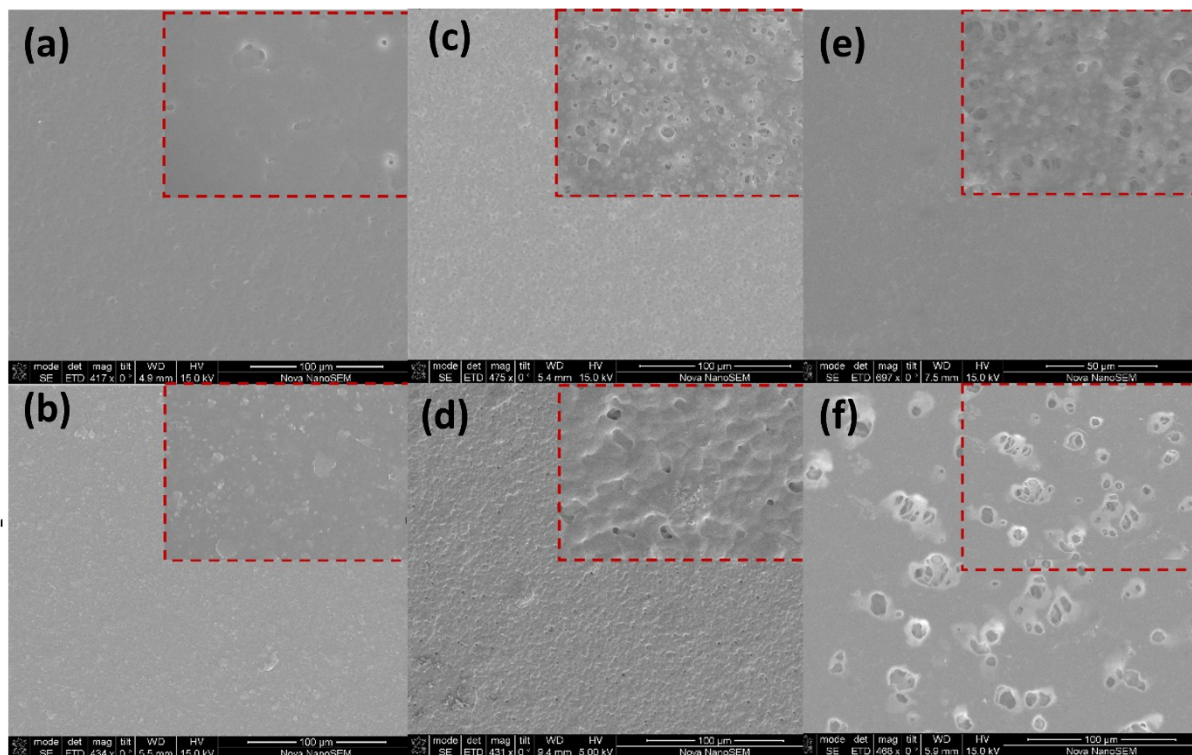

**Figure S4.** SEM images of spin-coated PVDF film and PVDF – TiO<sub>2</sub> films with 15 wt% TiO<sub>2</sub> loading – (a) Pristine PVDF film, (b) PVDF – TiO<sub>2</sub>500 film, (c) PVDF – TiO<sub>2</sub>600 film, (d) PVDF – TiO<sub>2</sub>700 film, (e) PVDF – TiO<sub>2</sub>900 film and (f) PVDF – TiO<sub>2</sub>1000 film

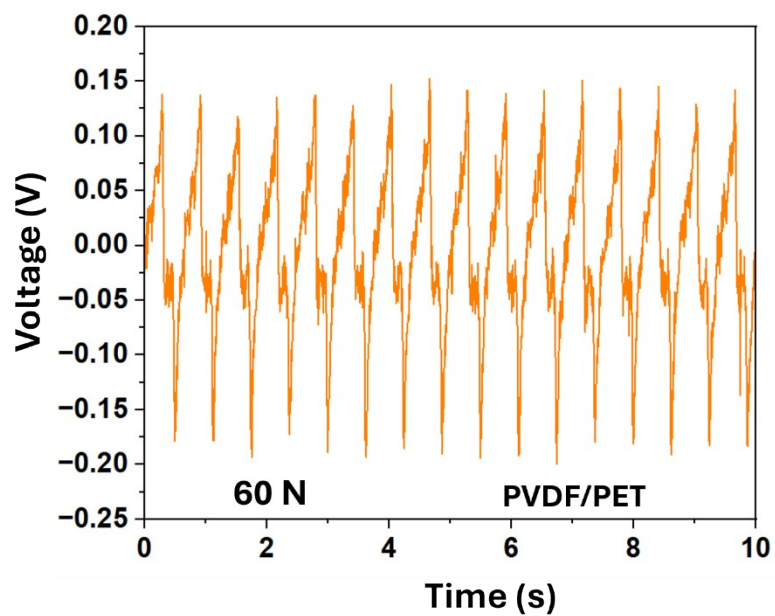

**Figure S5:** PE effect contribution on the electrical output of PVDF tested by pairing with ITO-coated PET films at a contact force 60N and a frequency of.



Video S6 attached
